# Supplementary material for: A systems-based approach to parameterise seismic hazard in regions with little historical or instrumental seismicity: active fault and seismogenic source databases for southern Malawi
Source: Copernicus journal article supplement (doi:10.5194/se-12-187-2021), 2021-01-27
Supplement: Supplementary file 1 [file SMSSD.xlsx]

## Sheet: Leonard2010
				SECTION AND FAULT GEOMETRY												SECTION AND FAULT SLIP RATES																	LEONARD 2010 SCALING RELATIONSHIPS SECTION							SECTION RECURRENCE INTERVALS				LEONARD 2010 SCALING RELATIONSHIPS FAULT
SMAFD ID	SMSSD ID	Basin	Fault	SEC_NAME	SEC_LEN	SEC_STR	FAULT_LEN	FLT_STR	DIP_L	DIP_M	DIP_U	DIP_DIR	U_SEIS_D	FLT_W		SLIP_TYPE	Component of rift extension (lower)	Component of rift extension (median)	Component of rift extension (upper)	Rift Extension Rate (lower, mm/yr)	Rift Extension Rate (median, mm/yr)	Rift Extension Rate (upper, mm/yr)	Plate motion aziumth (Lower)	Plate motion aziumth (Intermediate)	Plate motion aziumth (Upper)	SEC_SR_L	SEC_SR_M	SEC_SR_U	FLT_SR_L	FLT_SR_M	FLT_SR_LU		SEC_MAG_L	SEC_MAG_M	SEC_MAG_U	SEC_SED_L	SEC_SED_M	SEC_SED_U		SEC_RI_L	SEC_RI_M	SEC_RI_U		FLT_MAG_L	FLT_MAG_M	FLT_MAG_U	FLT_SED_L	FLT_SED_M	FLT_SED_U
1	1	Nsanje	Nsanje	Nsanje	NA	NA	33.2	22	40	53	65	E	0	18.0772		Normal	0.3	0.5	0.7	0.2	0.46	2.09	61	73	85	NA	NA	NA	0.0492912	0.297007	3.08444		NA	NA	NA	NA	NA	NA		NA	NA	NA		6.35081	6.7838	7.27163	0.304296	0.930931	3.51371
2	2	Mwanza	Mwanza	Mwanza West	30.4	132	144	127	40	53	65	SW	0	48.078		Normal	1	1	1	0.2	0.6	1	85	73	61	0.190943	0.854582	2.23729	0.174698	0.806577	2.16163		6.28704	6.72003	7.20786	0.282755	0.865029	3.26497		126.383	1012.22	17099.2		7.41286	7.84584	8.33367	1.03352	3.16183	11.934
2	3	Mwanza	Mwanza	Mwanza Majete	62.4	130	144	127	40	53	65	SW	0	48.078		Normal	1	1	1	0.2	0.6	1	85	73	61	0.184612	0.836141	2.20904	0.174698	0.806577	2.16163		6.80756	7.24054	7.72838	0.514836	1.57503	5.94482		233.059	1883.69	32201.6		7.41286	7.84584	8.33367	1.03352	3.16183	11.934
2	4	Mwanza	Mwanza	Mwanza Link-1	0.8	100	144	127	40	53	65	SW	0	48.078		Normal	1	1	1	0.2	0.6	1	85	73	61	NA	NA	NA	0.174698	0.806577	2.16163		NA	NA	NA	NA	NA	NA		NA	NA	NA		7.41286	7.84584	8.33367	1.03352	3.16183	11.934
2	5	Mwanza	Mwanza	Mwanza Thombani	10	138	144	127	40	53	65	SW	0	48.078		Normal	1	1	1	0.2	0.6	1	85	73	61	0.208509	0.903574	2.30556	0.174698	0.806577	2.16163		5.48225	5.91524	6.40307	0.111948	0.342481	1.29266		48.5556	379.029	6199.55		7.41286	7.84584	8.33367	1.03352	3.16183	11.934
2	6	Mwanza	Mwanza	Mwanza Link-2	2.1	80	144	127	40	53	65	SW	0	48.078		Normal	1	1	1	0.2	0.6	1	85	73	61	NA	NA	NA	0.174698	0.806577	2.16163		NA	NA	NA	NA	NA	NA		NA	NA	NA		7.41286	7.84584	8.33367	1.03352	3.16183	11.934
2	7	Mwanza	Mwanza	Mwanza Condedezi	21.6	133	144	127	40	53	65	SW	0	48.078		Normal	1	1	1	0.2	0.6	1	85	73	61	0.194021	0.863414	2.25039	0.174698	0.806577	2.16163		6.03967	6.47266	6.96049	0.21268	0.65065	2.45582		94.508	753.579	12657.5		7.41286	7.84584	8.33367	1.03352	3.16183	11.934
2	8	Mwanza	Mwanza	Mwanza Somba	16.7	96	144	127	40	53	65	SW	0	48.078		Normal	1	1	1	0.2	0.6	1	85	73	61	0.0498167	0.389553	1.3572	0.174698	0.806577	2.16163		5.85345	6.28643	6.77426	0.171638	0.525089	1.9819		126.465	1347.93	39783.8		7.41286	7.84584	8.33367	1.03352	3.16183	11.934
3	9	Lower Shire	Panga-1	Panga-1	NA	NA	6.2	125	40	53	65	NE	0	5.90608		Normal	0.02	0.06	0.1	0.2	0.69	2.34	85	73	61	NA	NA	NA	0.0033564	0.0542088	0.497654		NA	NA	NA	NA	NA	NA		NA	NA	NA		5.13624	5.56922	6.05706	0.0751637	0.229948	0.867916
4	10	Lower Shire	Panga-2	Panga-2	NA	NA	11.9	120	40	53	65	NE	0	9.12156		Normal	0.02	0.06	0.1	0.2	0.69	2.34	85	73	61	NA	NA	NA	0.002995	0.0503112	0.474606		NA	NA	NA	NA	NA	NA		NA	NA	NA		5.60816	6.04115	6.52898	0.129411	0.395906	1.49431
5	11	Lower Shire	Panga-3	Panga-3	NA	NA	17.4	125	40	53	65	NE	0	11.7509		Normal	0.02	0.06	0.1	0.2	0.69	2.34	85	73	61	NA	NA	NA	0.0033564	0.0542088	0.497654		NA	NA	NA	NA	NA	NA		NA	NA	NA		5.88317	6.31615	6.80399	0.177612	0.543368	2.05089
6	12	Lower Shire	Panga-4	Panga-4	NA	NA	28.2	129	40	53	65	NE	0	16.2133		Normal	0.02	0.06	0.1	0.2	0.69	2.34	85	73	61	NA	NA	NA	0.00362725	0.0570311	0.513374		NA	NA	NA	NA	NA	NA		NA	NA	NA		6.23267	6.66565	7.15349	0.265597	0.812538	3.06685
NA	NA	Lower Shire	Panga Multi-Fault Rupture		NA	NA	63.7	139	40	53	65	NE	0	27.9124		Normal	0.02	0.06	0.1	0.2	0.69	2.34	85	73	61	NA	NA	NA	0.00422439	0.0628445	0.541592		NA	NA	NA	NA	NA	NA		NA	NA	NA		6.82248	7.25547	7.7433	0.523759	1.60233	6.04785
7	13	Lower Shire	Mtumba	Mtumba-Southeast	15.1	131	48.7	134	40	53	65	NE	0	23.3377		Normal	0.02	0.06	0.1	0.2	0.69	2.34	85	73	61	0.00375613	0.0583388	0.5203	0.00394081	0.0601668	0.529497		5.78055	6.21353	6.70137	0.15782	0.482818	1.82235		303.326	8276.1	485168		6.62813	7.06112	7.54895	0.418751	1.28108	4.83532
7	14	Lower Shire	Mtumba	Mtumba-Link	1.2	39	48.7	134	40	53	65	NE	0	23.3377		Normal	0.02	0.06	0.1	0.2	0.69	2.34	85	73	61	NA	NA	NA	0.00394081	0.0601668	0.529497		NA	NA	NA	NA	NA	NA		NA	NA	NA		6.62813	7.06112	7.54895	0.418751	1.28108	4.83532
7	15	Lower Shire	Mtumba	Mtumba-Northwest	32.4	138	48.7	134	40	53	65	NE	0	23.3377		Normal	0.02	0.06	0.1	0.2	0.69	2.34	85	73	61	0.00417018	0.0623466	0.5395	0.00394081	0.0601668	0.529497		6.33316	6.76614	7.25398	0.298174	0.9122	3.44301		552.685	14631.1	825627		6.62813	7.06112	7.54895	0.418751	1.28108	4.83532
8	16	Lower Shire	Mudi	Mudi-Southeast	18	138	30	140	40	53	65	SW	0	16.8961		Normal	0.02	0.06	0.1	0.2	0.69	2.34	85	73	61	0.00417018	0.0623466	0.5395	0.00427731	0.0633233	0.543518		5.90771	6.34069	6.82852	0.182702	0.558937	2.10966		338.65	8964.99	505891		6.27745	6.71044	7.19827	0.279651	0.855533	3.22913
8	17	Lower Shire	Mudi	Mudi-Link	1.1	91	30	140	40	53	65	NE	0	16.8961		Normal	0.02	0.06	0.1	0.2	0.69	2.34	85	73	61	NA	NA	NA	0.00427731	0.0633233	0.543518		NA	NA	NA	NA	NA	NA		NA	NA	NA		6.27745	6.71044	7.19827	0.279651	0.855533	3.22913
8	18	Lower Shire	Mudi	Mudi-Northwest	10.9	146	30	140	40	53	65	SW	0	16.8961		Normal	0.02	0.06	0.1	0.2	0.69	2.34	85	73	61	0.00456694	0.065786	0.551584	0.00427731	0.0633233	0.543518		5.54463	5.97761	6.46545	0.120283	0.36798	1.38891		218.068	5593.6	304122		6.27745	6.71044	7.19827	0.279651	0.855533	3.22913
9	19	Lower Shire	Elephant Marsh	Elephant Marsh	33.1	137	33.1	137	40	53	65	SW	0	18.0408		Normal	0.02	0.06	0.1	0.2	0.69	2.34	85	73	61	NA	NA	NA	0.0041147	0.0618298	0.537244		NA	NA	NA	NA	NA	NA		NA	NA	NA		6.34863	6.78162	7.26945	0.303533	0.928594	3.50489
10	20	Lower Shire	Ruo	Ruo South	13.8	120	36	135	40	53	65	SW	0	19.0798		Normal	0.02	0.06	0.1	0.2	0.69	2.34	85	73	61	0.002995	0.0503112	0.474606	0.004	0.0607396	0.532242		5.71538	6.14837	6.6362	0.146413	0.447921	1.69064		308.495	8903.01	564486		6.40942	6.84241	7.33024	0.325537	0.995913	3.75898
10	21	Lower Shire	Ruo	Ruo Central	9.8	158	36	135	40	53	65	SW	0	19.0798		Normal	0.02	0.06	0.1	0.2	0.69	2.34	85	73	61	0.00499347	0.0685301	0.549564	0.004	0.0607396	0.532242		5.46763	5.90061	6.38845	0.110079	0.336763	1.27108		200.302	4914.09	254549		6.40942	6.84241	7.33024	0.325537	0.995913	3.75898
10	22	Lower Shire	Ruo	Ruo North	12.4	134	36	135	40	53	65	SW	0	19.0798		Normal	0.02	0.06	0.1	0.2	0.69	2.34	85	73	61	0.00394081	0.0601668	0.529497	0.004	0.0607396	0.532242		5.63795	6.07094	6.55877	0.133927	0.40972	1.54645		252.931	6809.74	392419		6.40942	6.84241	7.33024	0.325537	0.995913	3.75898
11	23	Lower Shire	Thyolo	Thyolo North	25.9	150	98	144	40	53	65	SW	0	37.1982		Normal	0.5	0.7	0.9	0.2	0.69	2.34	85	73	61	0.11831	0.782002	4.98246	0.111895	0.758847	4.94608		6.17108	6.60407	7.0919	0.247418	0.756924	2.85694		49.6578	967.931	24147.9		7.13429	7.56728	8.05511	0.749958	2.29434	8.65977
11	24	Lower Shire	Thyolo	Thyolo Mbewe	14	132	98	144	40	53	65	SW	0	37.1982		Normal	0.5	0.7	0.9	0.2	0.69	2.34	85	73	61	0.0954714	0.687939	4.71173	0.111895	0.758847	4.94608		5.7258	6.15878	6.64662	0.14818	0.453325	1.71103		31.4491	658.961	17921.9		7.13429	7.56728	8.05511	0.749958	2.29434	8.65977
11	25	Lower Shire	Thyolo	Thyolo Kalulu	26.7	134	98	144	40	53	65	SW	0	37.1982		Normal	0.5	0.7	0.9	0.2	0.69	2.34	85	73	61	0.0985203	0.701945	4.76548	0.111895	0.758847	4.94608		6.1931	6.62609	7.11392	0.253771	0.776358	2.93029		53.2519	1106.01	29743		7.13429	7.56728	8.05511	0.749958	2.29434	8.65977
11	26	Lower Shire	Thyolo	Thyolo Link	4.6	33	98	144	40	53	65	NW	0	37.1982		Normal	0.5	0.7	0.9	0.2	0.69	2.34	85	73	61	NA	NA	NA	0.111895	0.758847	4.94608		NA	NA	NA	NA	NA	NA		NA	NA	NA		7.13429	7.56728	8.05511	0.749958	2.29434	8.65977
11	27	Lower Shire	Thyolo	Thyolo Muona	26.8	140	98	144	40	53	65	SW	0	37.1982		Normal	0.5	0.7	0.9	0.2	0.69	2.34	85	73	61	0.106933	0.738772	4.89166	0.111895	0.758847	4.94608		6.19581	6.62879	7.11663	0.254562	0.77878	2.93943		52.04	1054.16	27488.6		7.13429	7.56728	8.05511	0.749958	2.29434	8.65977
12	28	Zomba	Zomba	Zomba South	16.5	25	59.4	26	40	53	65	W	0	26.6417		Normal	0.5	0.7	0.9	0.2	0.88	2.53	61	73	85	0.0767299	0.760661	4.66601	0.0748751	0.748592	4.61828		5.84472	6.27771	6.76554	0.169923	0.519843	1.9621		36.4172	683.41	25571.5		6.7719	7.20488	7.69271	0.494125	1.51167	5.70567
12	29	Zomba	Zomba	Zomba Chingale Stream	13	26	59.4	26	40	53	65	W	0	26.6417		Normal	0.5	0.7	0.9	0.2	0.88	2.53	61	73	85	0.0748751	0.748592	4.61828	0.0748751	0.748592	4.61828		5.67216	6.10514	6.59298	0.139305	0.426176	1.60856		30.1639	569.303	21483.3		6.7719	7.20488	7.69271	0.494125	1.51167	5.70567
12	30	Zomba	Zomba	Zomba Mwinje	8	28	59.4	26	40	53	65	W	0	26.6417		Normal	0.5	0.7	0.9	0.2	0.88	2.53	61	73	85	0.0710976	0.723774	4.51862	0.0748751	0.748592	4.61828		5.32073	5.75372	6.24155	0.0929516	0.284366	1.07331		20.5708	392.894	15096.3		6.7719	7.20488	7.69271	0.494125	1.51167	5.70567
12	31	Zomba	Zomba	Zomba North	21.9	25	59.4	26	40	53	65	W	0	26.6417		Normal	0.5	0.7	0.9	0.2	0.88	2.53	61	73	85	0.0767299	0.760661	4.66601	0.0748751	0.748592	4.61828		6.04966	6.48264	6.97048	0.215139	0.658172	2.48421		46.1077	865.263	32376		6.7719	7.20488	7.69271	0.494125	1.51167	5.70567
13	32	Zomba	Chingale Step	Chingale Step South	14.2	31	42.2	22	40	53	65	NW	0	21.2119		Normal	0.02	0.06	0.1	0.2	0.88	2.53	61	73	85	0.00261081	0.0587059	0.484317	0.00328608	0.0681826	0.5334		5.73607	6.16905	6.65688	0.149942	0.458715	1.73138		309.594	7813.78	663156		6.52444	6.95742	7.44526	0.371628	1.13692	4.2912
13	33	Zomba	Chingale Step	Chingale Step Central	9.6	12	42.2	22	40	53	65	NW	0	21.2119		Normal	0.02	0.06	0.1	0.2	0.88	2.53	61	73	85	0.00394081	0.0767344	0.572491	0.00328608	0.0681826	0.5334		5.4527	5.88569	6.37352	0.108203	0.331026	1.24943		189.005	4313.92	317048		6.52444	6.95742	7.44526	0.371628	1.13692	4.2912
13	34	Zomba	Chingale Step	Chingale Step North	18.4	20	42.2	22	40	53	65	NW	0	21.2119		Normal	0.02	0.06	0.1	0.2	0.88	2.53	61	73	85	0.0034257	0.070068	0.54256	0.00328608	0.0681826	0.5334		5.92361	6.3566	6.84443	0.186079	0.569269	2.14865		342.964	8124.52	627216		6.52444	6.95742	7.44526	0.371628	1.13692	4.2912
14	35	Zomba	Mlungusi	Mlungusi South	6.1	18	22.3	13	40	53	65	E	0	13.8646		Normal	0.02	0.06	0.1	0.2	0.88	2.53	61	73	85	0.00356114	0.071868	0.551059	0.00388043	0.0759804	0.569349		5.12447	5.55745	6.04529	0.0741521	0.226853	0.856235		134.563	3156.52	240438		6.06276	6.49574	6.98358	0.218408	0.668175	2.52196
14	36	Zomba	Mlungusi	Mlungusi Central	4.7	15	22.3	13	40	53	65	E	0	13.8646		Normal	0.02	0.06	0.1	0.2	0.88	2.53	61	73	85	0.00375613	0.0744032	0.562546	0.00388043	0.0759804	0.569349		4.93575	5.36873	5.85657	0.059671	0.182551	0.689022		106.073	2453.54	183439		6.06276	6.49574	6.98358	0.218408	0.668175	2.52196
14	37	Zomba	Mlungusi	Mlungusi North	11.5	10	22.3	13	40	53	65	E	0	13.8646		Normal	0.02	0.06	0.1	0.2	0.88	2.53	61	73	85	0.00405797	0.0781721	0.578251	0.00388043	0.0759804	0.569349		5.58341	6.0164	6.50423	0.125776	0.384784	1.45233		217.511	4922.27	357897		6.06276	6.49574	6.98358	0.218408	0.668175	2.52196
15	38	Zomba	Mtsimukwe	Mtsimukwe	NA	NA	11.5	172	40	53	65	E	0	8.916		Normal	0.02	0.06	0.1	0.2	0.88	2.53	61	73	85	NA	NA	NA	0.00487481	0.0866544	0.597829		NA	NA	NA	NA	NA	NA		NA	NA	NA		5.58341	6.0164	6.50423	0.125776	0.384784	1.45233
16	39	Zomba	Lisungwe	Lisungwe South	8.8	178	18.7	14	40	53	65	E	0	12.3291		Normal	0.02	0.06	0.1	0.2	0.88	2.53	61	73	85	0.00465251	0.0847451	0.597829	0.00381886	0.0752032	0.566034		5.38972	5.82271	6.31054	0.100635	0.307873	1.16204		168.335	3632.93	249766		5.93532	6.36831	6.85614	0.188604	0.576993	2.17781
16	40	Zomba	Lisungwe	Lisungwe Link	2.1	85	18.7	14	40	53	65	E	0	12.3291		Normal	0.02	0.06	0.1	0.2	0.88	2.53	61	73	85	NA	NA	NA	0.00381886	0.0752032	0.566034		NA	NA	NA	NA	NA	NA		NA	NA	NA		5.93532	6.36831	6.85614	0.188604	0.576993	2.17781
16	41	Zomba	Lisungwe	Lisungwe North	7.8	17	18.7	14	40	53	65	E	0	12.3291		Normal	0.02	0.06	0.1	0.2	0.88	2.53	61	73	85	0.00362725	0.0727353	0.555058	0.00381886	0.0752032	0.566034		5.30241	5.73539	6.22323	0.091011	0.278429	1.0509		163.967	3827.98	289725		5.93532	6.36831	6.85614	0.188604	0.576993	2.17781
17	42	Zomba	Wamkurumadzi	Wamkurumadzi South	28.4	5	40.9	9	40	53	65	E	0	20.774		Normal	0.02	0.06	0.1	0.2	0.88	2.53	61	73	85	0.00432893	0.0813461	0.589554	0.0041147	0.0788553	0.580867		6.23778	6.67077	7.1586	0.267166	0.817337	3.08496		453.165	10047.6	712639		6.50179	6.93478	7.42261	0.362063	1.10766	4.18075
17	43	Zomba	Wamkurumadzi	Wamkurumadzi North	12.5	19	40.9	9	40	53	65	E	0	20.774		Normal	0.02	0.06	0.1	0.2	0.88	2.53	61	73	85	0.00349395	0.0709788	0.546893	0.0041147	0.0788553	0.580867		5.64377	6.07675	6.56459	0.134826	0.412472	1.55684		246.531	5811.2	445580		6.50179	6.93478	7.42261	0.362063	1.10766	4.18075
18	44	Makanjira	Tsikulamowa	Tsikulamowa	NA	NA	14	9	40	53	65	E	0	10.1654		Normal	0.025	0.075	0.125	0.2	1.08	2.74	61	73	85	NA	NA	NA	0.00514337	0.120971	0.786351		NA	NA	NA	NA	NA	NA		NA	NA	NA		5.7258	6.15878	6.64662	0.14818	0.453325	1.71103
19	45	Makanjira	Chirobwe-Ncheu	Chirobwe-Ncheu North	22.5	164	120.6	163	40	53	65	E	0	42.7172		Normal	0.25	0.35	0.45	0.2	1.08	2.74	85	61	73	0.0640712	0.612002	2.91708	0.0638441	0.614374	2.91753		6.06922	6.50221	6.99004	0.220039	0.673165	2.5408		75.4314	1099.94	39655.9		7.2845	7.71748	8.20532	0.891534	2.72746	10.2945
19	46	Makanjira	Chirobwe-Ncheu	Chirobwe-Ncheu Livulezi	23.2	163	120.6	163	40	53	65	E	0	42.7172		Normal	0.25	0.35	0.45	0.2	1.08	2.74	85	61	73	0.0638441	0.614374	2.91753	0.0638441	0.614374	2.91753		6.0914	6.52438	7.01222	0.22573	0.690572	2.6065		77.3702	1124.03	40826.1		7.2845	7.71748	8.20532	0.891534	2.72746	10.2945
19	47	Makanjira	Chirobwe-Ncheu	Chirobwe-Ncheu Central	7.7	166	120.6	163	40	53	65	E	0	42.7172		Normal	0.25	0.35	0.45	0.2	1.08	2.74	85	61	73	0.0644668	0.606698	2.91353	0.0638441	0.614374	2.91753		5.29307	5.72605	6.21389	0.0900377	0.275451	1.03967		30.9033	454.017	16127.1		7.2845	7.71748	8.20532	0.891534	2.72746	10.2945
19	48	Makanjira	Chirobwe-Ncheu	Chirobwe-Ncheu Link-2	1.6	74	120.6	163	40	53	65	E	0	42.7172		Normal	0.25	0.35	0.45	0.2	1.08	2.74	85	61	73	NA	NA	NA	0.0638441	0.614374	2.91753		NA	NA	NA	NA	NA	NA		NA	NA	NA		7.2845	7.71748	8.20532	0.891534	2.72746	10.2945
19	49	Makanjira	Chirobwe-Ncheu	Chirobwe-Ncheu South	7.7	169	120.6	163	40	53	65	E	0	42.7172		Normal	0.25	0.35	0.45	0.2	1.08	2.74	85	61	73	0.0649128	0.597359	2.90154	0.0638441	0.614374	2.91753		5.29307	5.72605	6.21389	0.0900377	0.275451	1.03967		31.0309	461.116	16016.3		7.2845	7.71748	8.20532	0.891534	2.72746	10.2945
19	50	Makanjira	Chirobwe-Ncheu	Chirobwe-Ncheu Link-1	0.7	57	120.6	163	40	53	65	E	0	42.7172		Normal	0.25	0.35	0.45	0.2	1.08	2.74	85	61	73	NA	NA	NA	0.0638441	0.614374	2.91753		NA	NA	NA	NA	NA	NA		NA	NA	NA		7.2845	7.71748	8.20532	0.891534	2.72746	10.2945
19	51	Makanjira	Chirobwe-Ncheu	Chirobwe-Ncheu Dzonze	32.5	158	120.6	163	40	53	65	E	0	42.7172		Normal	0.25	0.35	0.45	0.2	1.08	2.74	85	61	73	0.0624184	0.623418	2.90642	0.0638441	0.614374	2.91753		6.33539	6.76838	7.25621	0.29894	0.914546	3.45187		102.855	1466.99	55302.1		7.2845	7.71748	8.20532	0.891534	2.72746	10.2945
19	52	Makanjira	Chirobwe-Ncheu	Chirobwe-Ncheu Ncheu	20.1	140	120.6	163	40	53	65	E	0	42.7172		Normal	0.25	0.35	0.45	0.2	1.08	2.74	85	61	73	0.0534664	0.61656	2.6856	0.0638441	0.614374	2.91753		5.98758	6.42056	6.9084	0.200299	0.612773	2.31285		74.5826	993.857	43258.1		7.2845	7.71748	8.20532	0.891534	2.72746	10.2945
19	53	Makanjira	Chirobwe-Ncheu	Chirobwe-Ncheu Link 3	4.6	178	120.6	163	40	53	65	E	0	42.7172		Normal	0.25	0.35	0.45	0.2	1.08	2.74	85	61	73	NA	NA	NA	0.0638441	0.614374	2.91753		NA	NA	NA	NA	NA	NA		NA	NA	NA		7.2845	7.71748	8.20532	0.891534	2.72746	10.2945
20	54	Makanjira	Bilila-Mtakataka	Bilila	29.2	145	140.3	149	40	53	65	NE	0	47.2509		Normal	0.025	0.075	0.125	0.2	1.08	2.74	85	73	61	0.00565258	0.128005	0.805984	0.00586646	0.130595	0.80993		6.25789	6.69087	7.17871	0.273423	0.836479	3.15721		339.24	6534.72	558543		7.39401	7.827	8.31483	1.01134	3.09398	11.6779
20	55	Makanjira	Bilila-Mtakataka	Mtakataka	11.7	7	140.3	149	40	53	65	NE	0	47.2509		Normal	0.025	0.075	0.125	0.2	1.08	2.74	85	73	61	0.00638441	0.122957	0.655647	0.00586646	0.130595	0.80993		5.59589	6.02888	6.51671	0.127596	0.390353	1.47335		194.611	3174.72	230773		7.39401	7.827	8.31483	1.01134	3.09398	11.6779
20	56	Makanjira	Bilila-Mtakataka	Citsulo	19.4	138	140.3	149	40	53	65	NE	0	47.2509		Normal	0.025	0.075	0.125	0.2	1.08	2.74	85	73	61	0.00521272	0.121983	0.789653	0.00586646	0.130595	0.80993		5.96192	6.39491	6.88274	0.194469	0.594937	2.24553		246.271	4877.23	430779		7.39401	7.827	8.31483	1.01134	3.09398	11.6779
20	57	Makanjira	Bilila-Mtakataka	Kasinje	18.4	150	140.3	149	40	53	65	NE	0	47.2509		Normal	0.025	0.075	0.125	0.2	1.08	2.74	85	73	61	0.0059155	0.131143	0.810301	0.00586646	0.130595	0.80993		5.92361	6.3566	6.84443	0.186079	0.569269	2.14865		229.642	4340.82	363224		7.39401	7.827	8.31483	1.01134	3.09398	11.6779
20	58	Makanjira	Bilila-Mtakataka	Mua	20.4	159	140.3	149	40	53	65	NE	0	47.2509		Normal	0.025	0.075	0.125	0.2	1.08	2.74	85	73	61	0.00627419	0.134265	0.802537	0.00586646	0.130595	0.80993		5.9983	6.43129	6.91912	0.202787	0.620385	2.34158		252.683	4620.6	373209		7.39401	7.827	8.31483	1.01134	3.09398	11.6779
20	59	Makanjira	Bilila-Mtakataka	Ngodzi	15.7	144	140.3	149	40	53	65	NE	0	47.2509		Normal	0.025	0.075	0.125	0.2	1.08	2.74	85	73	61	0.00559476	0.12726	0.804383	0.00586646	0.130595	0.80993		5.80875	6.24174	6.72957	0.163029	0.498753	1.8825		202.676	3919.17	336475		7.39401	7.827	8.31483	1.01134	3.09398	11.6779
20	60	Makanjira	Bilila-Mtakataka	Linthipe	25.5	143	140.3	149	40	53	65	NE	0	47.2509		Normal	0.025	0.075	0.125	0.2	1.08	2.74	85	73	61	0.00553524	0.126476	0.802537	0.00586646	0.130595	0.80993		6.15982	6.5928	7.08064	0.24423	0.74717	2.82012		304.322	5907.61	509485		7.39401	7.827	8.31483	1.01134	3.09398	11.6779
21	61	Makanjira	Cape Maclear	Cape Maclear	NA	NA	14.4	28	40	53	65	W	0	10.3581		Normal	0.025	0.075	0.125	0.2	1.08	2.74	61	73	85	NA	NA	NA	0.00355488	0.0951715	0.679679		NA	NA	NA	NA	NA	NA		NA	NA	NA		5.74619	6.17917	6.66701	0.151699	0.464093	1.75167
22	62	Makanjira	Malombe	Malombe North	15.8	178	58.4	4	40	53	65	E	0	26.3419		Normal	0.025	0.075	0.125	0.2	1.08	2.74	61	73	85	0.00581563	0.130007	0.809313	0.00547403	0.125653	0.800446		5.81335	6.24633	6.73417	0.163894	0.501399	1.89248		202.51	3856.72	325413		6.75961	7.19259	7.68042	0.487184	1.49044	5.62551
22	63	Makanjira	Malombe	Malombe Central	23.2	3	58.4	4	40	53	65	E	0	26.3419		Normal	0.025	0.075	0.125	0.2	1.08	2.74	61	73	85	0.00553524	0.126476	0.802537	0.00547403	0.125653	0.800446		6.0914	6.52438	7.01222	0.22573	0.690572	2.6065		281.27	5460.11	470892		6.75961	7.19259	7.68042	0.487184	1.49044	5.62551
22	64	Makanjira	Malombe	Malombe Link	1.8	71	58.4	4	40	53	65	E	0	26.3419		Normal	0.025	0.075	0.125	0.2	1.08	2.74	61	73	85	NA	NA	NA	0.00547403	0.125653	0.800446		NA	NA	NA	NA	NA	NA		NA	NA	NA		6.75961	7.19259	7.68042	0.487184	1.49044	5.62551
22	65	Makanjira	Malombe	Malombe South-1	8.8	159	58.4	4	40	53	65	E	0	26.3419		Normal	0.025	0.075	0.125	0.2	1.08	2.74	61	73	85	0.00646352	0.134265	0.77903	0.00547403	0.125653	0.800446		5.38972	5.82271	6.31054	0.100635	0.307873	1.16204		129.18	2293.02	179784		6.75961	7.19259	7.68042	0.487184	1.49044	5.62551
22	66	Makanjira	Malombe	Malombe South-2	8.8	34	58.4	4	40	53	65	E	0	26.3419		Normal	0.025	0.075	0.125	0.2	1.08	2.74	61	73	85	0.00296321	0.084702	0.629818	0.00547403	0.125653	0.800446		5.38972	5.82271	6.31054	0.100635	0.307873	1.16204		159.785	3634.78	392155		6.75961	7.19259	7.68042	0.487184	1.49044	5.62551
23	67	Makanjira	Makanjira	Makanjira South	52.8	11	120	177	40	53	65	W	0	42.5754		Normal	0.25	0.35	0.45	0.2	1.08	2.74	61	73	85	0.05	0.554579	2.80451	0.0586646	0.609443	2.91575		6.68664	7.11963	7.60746	0.44793	1.37035	5.17225		159.718	2470.97	103445		7.28089	7.71387	8.20171	0.887836	2.71615	10.2519
23	68	Makanjira	Makanjira	Makanjira Link-1	1.1	67	120	177	40	53	65	W	0	42.5754		Normal	0.25	0.35	0.45	0.2	1.08	2.74	61	73	85	NA	NA	NA	0.0586646	0.609443	2.91575		NA	NA	NA	NA	NA	NA		NA	NA	NA		7.28089	7.71387	8.20171	0.887836	2.71615	10.2519
23	69	Makanjira	Makanjira	Makanjira Namjola	16.4	156	120	177	40	53	65	W	0	42.5754		Normal	0.25	0.35	0.45	0.2	1.08	2.74	61	73	85	0.065022	0.623418	2.75858	0.0586646	0.609443	2.91575		5.84032	6.27331	6.76114	0.169064	0.517217	1.95219		61.2868	829.646	30023.5		7.28089	7.71387	8.20171	0.887836	2.71615	10.2519
23	70	Makanjira	Makanjira	Makanjira Link-2	2.8	66	120	177	40	53	65	W	0	42.5754		Normal	0.25	0.35	0.45	0.2	1.08	2.74	61	73	85	NA	NA	NA	0.0586646	0.609443	2.91575		NA	NA	NA	NA	NA	NA		NA	NA	NA		7.28089	7.71387	8.20171	0.887836	2.71615	10.2519
23	71	Makanjira	Makanjira	Makanjira Link-3	3.6	146	120	177	40	53	65	W	0	42.5754		Normal	0.25	0.35	0.45	0.2	1.08	2.74	61	73	85	NA	NA	NA	0.0586646	0.609443	2.91575		NA	NA	NA	NA	NA	NA		NA	NA	NA		7.28089	7.71387	8.20171	0.887836	2.71615	10.2519
23	72	Makanjira	Makanjira	Makanjira Chembe	12.7	156	120	177	40	53	65	W	0	42.5754		Normal	0.25	0.35	0.45	0.2	1.08	2.74	61	73	85	0.065022	0.623418	2.75858	0.0586646	0.609443	2.91575		5.65526	6.08824	6.57608	0.136621	0.417964	1.57757		49.526	670.439	24262		7.28089	7.71387	8.20171	0.887836	2.71615	10.2519
23	73	Makanjira	Makanjira	Makanjira Gome	8.7	146	120	177	40	53	65	W	0	42.5754		Normal	0.25	0.35	0.45	0.2	1.08	2.74	61	73	85	0.065022	0.600655	2.55173	0.0586646	0.609443	2.91575		5.38145	5.81444	6.30227	0.0996815	0.304955	1.15102		39.0643	507.704	17702.1		7.28089	7.71387	8.20171	0.887836	2.71615	10.2519
23	74	Makanjira	Makanjira	Makanjira Malindi	21.9	176	120	177	40	53	65	W	0	42.5754		Normal	0.25	0.35	0.45	0.2	1.08	2.74	61	73	85	0.059155	0.612002	2.91708	0.0586646	0.609443	2.91575		6.04966	6.48264	6.97048	0.215139	0.658172	2.48421		73.7514	1075.44	41994.9		7.28089	7.71387	8.20171	0.887836	2.71615	10.2519
