# Supplementary material for: A systems-based approach to parameterise seismic hazard in regions with little historical or instrumental seismicity: active fault and seismogenic source databases for southern Malawi
Source: Copernicus journal article supplement (doi:10.5194/se-12-187-2021), 2021-01-27
Supplement: Supplementary file 1 [file TableS1.pdf › TableS1.pdf]

1    **Figure S1**

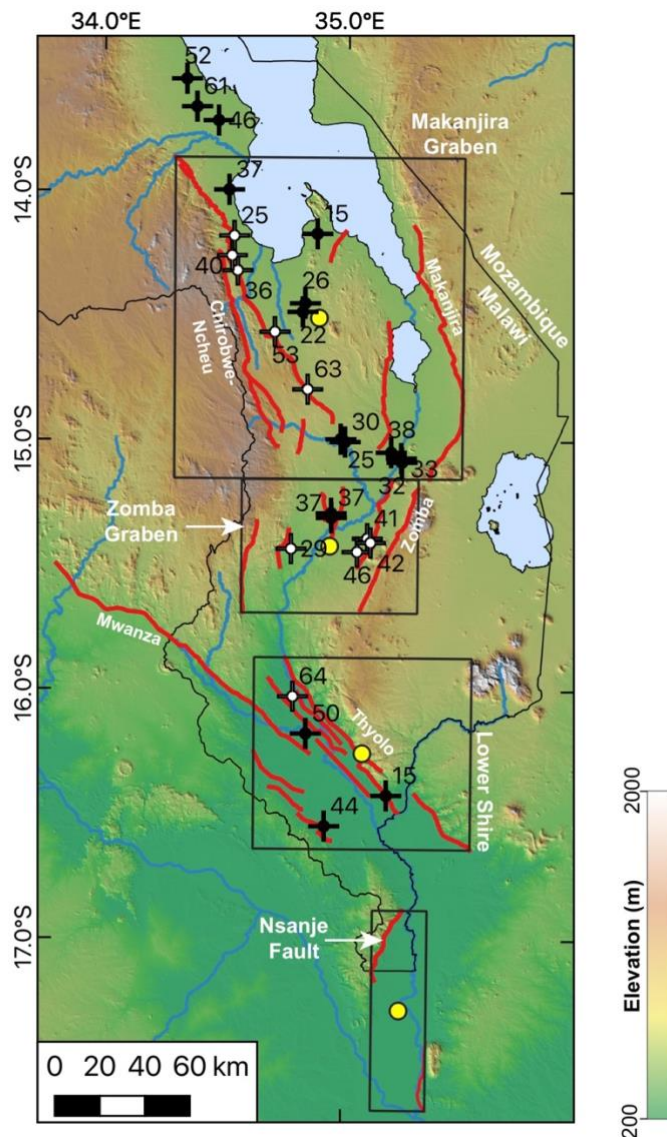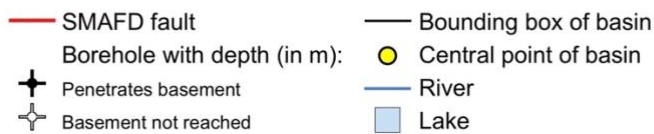

2

3    Figure S1: Active fault map for southern Malawi with extent and central point of its basins,  
4    from which the Nubia-Rovuma plate motion vectors were derived (Table 3). Labelled faults  
5    indicate border faults in the South Malawi Seismogenic Source Database (SMSSD). Location  
6    of boreholes also shown (Bloomfield and Garson, 1965; Habgood, 1963; Habgood et al.,  
7    1973; Walshaw, 1965; Walter, 1972). Mwanza basin extent not shown, as extension rate of

8 this basin is not constrained by geodesy. Map underlain by 30 m resolution Shuttle Radar

9 Topographic Mission digital elevation model.

10

11

12 **Table S1**

| Combination | Compo                      |             |                       |          |                         |     |          | Natural                 |
|-------------|----------------------------|-------------|-----------------------|----------|-------------------------|-----|----------|-------------------------|
|             | ment of regional extension | $v$ (mm/yr) | $\phi$ ( $^{\circ}$ ) | $\delta$ | C1 ( $\text{m}^{1/3}$ ) | C2  | $L$ (km) | log Recurrence Interval |
| 1           | 0.1                        | 2.53        | 85                    | 65       | 12                      | 12  | 9.6      | 7.37                    |
| 2           | 0.02                       | 2.53        | 85                    | 65       | 12                      | 1.5 | 9.6      | 6.90                    |
| 3           | 0.1                        | 0.2         | 85                    | 65       | 12                      | 1.5 | 9.6      | 7.83                    |
| 4           | 0.02                       | 0.2         | 85                    | 65       | 12                      | 12  | 9.6      | 11.52                   |
| 5           | 0.1                        | 2.53        | 85                    | 65       | 12                      | 1.5 | 38       | 6.44                    |
| 6           | 0.02                       | 2.53        | 85                    | 65       | 12                      | 12  | 38       | 10.13                   |
| 7           | 0.1                        | 0.2         | 85                    | 65       | 12                      | 12  | 38       | 11.06                   |
| 8           | 0.02                       | 0.2         | 85                    | 65       | 12                      | 1.5 | 38       | 10.59                   |
| 9           | 0.1                        | 2.53        | 61                    | 65       | 12                      | 1.5 | 9.6      | 5.62                    |
| 10          | 0.02                       | 2.53        | 61                    | 65       | 12                      | 12  | 9.6      | 9.31                    |
| 11          | 0.1                        | 0.2         | 61                    | 65       | 12                      | 12  | 9.6      | 10.24                   |
| 12          | 0.02                       | 0.2         | 61                    | 65       | 12                      | 1.5 | 9.6      | 9.77                    |
| 13          | 0.1                        | 2.53        | 61                    | 65       | 12                      | 12  | 38       | 8.84                    |
| 14          | 0.02                       | 2.53        | 61                    | 65       | 12                      | 1.5 | 38       | 8.37                    |
| 15          | 0.1                        | 0.2         | 61                    | 65       | 12                      | 1.5 | 38       | 9.30                    |
| 16          | 0.02                       | 0.2         | 61                    | 65       | 12                      | 12  | 38       | 12.99                   |
| 17          | 0.1                        | 2.53        | 85                    | 40       | 12                      | 1.5 | 9.6      | 5.89                    |
| 18          | 0.02                       | 2.53        | 85                    | 40       | 12                      | 12  | 9.6      | 9.58                    |
| 19          | 0.1                        | 0.2         | 85                    | 40       | 12                      | 12  | 9.6      | 10.51                   |
| 20          | 0.02                       | 0.2         | 85                    | 40       | 12                      | 1.5 | 9.6      | 10.04                   |
| 21          | 0.1                        | 2.53        | 85                    | 40       | 12                      | 12  | 38       | 9.12                    |
| 22          | 0.02                       | 2.53        | 85                    | 40       | 12                      | 1.5 | 38       | 8.65                    |
| 23          | 0.1                        | 0.2         | 85                    | 40       | 12                      | 1.5 | 38       | 9.57                    |
| 24          | 0.02                       | 0.2         | 85                    | 40       | 12                      | 12  | 38       | 13.26                   |
| 25          | 0.1                        | 2.53        | 61                    | 40       | 12                      | 12  | 9.6      | 8.29                    |
| 26          | 0.02                       | 2.53        | 61                    | 40       | 12                      | 1.5 | 9.6      | 7.82                    |
| 27          | 0.1                        | 0.2         | 61                    | 40       | 12                      | 1.5 | 9.6      | 8.75                    |
| 28          | 0.02                       | 0.2         | 61                    | 40       | 12                      | 12  | 9.6      | 12.44                   |
| 29          | 0.1                        | 2.53        | 61                    | 40       | 12                      | 1.5 | 38       | 7.36                    |
| 30          | 0.02                       | 2.53        | 61                    | 40       | 12                      | 12  | 38       | 11.05                   |
| 31          | 0.1                        | 0.2         | 61                    | 40       | 12                      | 12  | 38       | 11.98                   |

|             |          |        |            |          |                     |     |          |          |
|-------------|----------|--------|------------|----------|---------------------|-----|----------|----------|
| 32          | 0.02     | 0.2    | 61         | 40       | 12                  | 1.5 | 38       | 11.51    |
| 33          | 0.1      | 2.53   | 85         | 65       | 25                  | 1.5 | 9.6      | 5.66     |
| Combination | Compo    |        |            |          |                     |     |          | Natural  |
|             | nent of  | $v$    |            |          |                     |     |          | log      |
|             | regional | (mm/yr | $\phi$ (°) | $\delta$ | C1                  | C2  | $L$ (km) | Reccurre |
|             | extensio | )      |            |          | (m <sup>1/3</sup> ) |     |          | n        |
|             | n        |        |            |          |                     |     |          | Interval |
| 34          | 0.02     | 2.53   | 85         | 65       | 25                  | 12  | 9.6      | 9.35     |
| 35          | 0.1      | 0.2    | 85         | 65       | 25                  | 12  | 9.6      | 10.28    |
| 36          | 0.02     | 0.2    | 85         | 65       | 25                  | 1.5 | 9.6      | 9.81     |
| 37          | 0.1      | 2.53   | 85         | 65       | 25                  | 12  | 38       | 8.89     |
| 38          | 0.02     | 2.53   | 85         | 65       | 25                  | 1.5 | 38       | 8.42     |
| 39          | 0.1      | 0.2    | 85         | 65       | 25                  | 1.5 | 38       | 9.35     |
| 40          | 0.02     | 0.2    | 85         | 65       | 25                  | 12  | 38       | 13.04    |
| 41          | 0.1      | 2.53   | 61         | 65       | 25                  | 12  | 9.6      | 8.07     |
| 42          | 0.02     | 2.53   | 61         | 65       | 25                  | 1.5 | 9.6      | 7.60     |
| 43          | 0.1      | 0.2    | 61         | 65       | 25                  | 1.5 | 9.6      | 8.52     |
| 44          | 0.02     | 0.2    | 61         | 65       | 25                  | 12  | 9.6      | 12.21    |
| 45          | 0.1      | 2.53   | 61         | 65       | 25                  | 1.5 | 38       | 7.13     |
| 46          | 0.02     | 2.53   | 61         | 65       | 25                  | 12  | 38       | 10.82    |
| 47          | 0.1      | 0.2    | 61         | 65       | 25                  | 12  | 38       | 11.75    |
| 48          | 0.02     | 0.2    | 61         | 65       | 25                  | 1.5 | 38       | 11.28    |
| 49          | 0.1      | 2.53   | 85         | 40       | 25                  | 12  | 9.6      | 8.34     |
| 50          | 0.02     | 2.53   | 85         | 40       | 25                  | 1.5 | 9.6      | 7.87     |
| 51          | 0.1      | 0.2    | 85         | 40       | 25                  | 1.5 | 9.6      | 8.79     |
| 52          | 0.02     | 0.2    | 85         | 40       | 25                  | 12  | 9.6      | 12.48    |
| 53          | 0.1      | 2.53   | 85         | 40       | 25                  | 1.5 | 38       | 7.40     |
| 54          | 0.02     | 2.53   | 85         | 40       | 25                  | 12  | 38       | 11.09    |
| 55          | 0.1      | 0.2    | 85         | 40       | 25                  | 12  | 38       | 12.02    |
| 56          | 0.02     | 0.2    | 85         | 40       | 25                  | 1.5 | 38       | 11.55    |
| 57          | 0.1      | 2.53   | 61         | 40       | 25                  | 1.5 | 9.6      | 6.58     |
| 58          | 0.02     | 2.53   | 61         | 40       | 25                  | 12  | 9.6      | 10.27    |
| 59          | 0.1      | 0.2    | 61         | 40       | 25                  | 12  | 9.6      | 11.20    |
| 60          | 0.02     | 0.2    | 61         | 40       | 25                  | 1.5 | 9.6      | 10.73    |
| 61          | 0.1      | 2.53   | 61         | 40       | 25                  | 12  | 38       | 9.81     |
| 62          | 0.02     | 2.53   | 61         | 40       | 25                  | 1.5 | 38       | 9.34     |
| 63          | 0.1      | 0.2    | 61         | 40       | 25                  | 1.5 | 38       | 10.26    |
| 64          | 0.02     | 0.2    | 61         | 40       | 25                  | 12  | 38       | 13.95    |

Table S1: Input parameter combinations and Chingale Step fault central section recurrence intervals using upper and lower values outlined in Table 5, and a fractional factorial approach with  $2^{k-p}$  combinations where  $k$  is 7 and  $p$  is 1. This table is derived where values for  $\nu$  are taken from the Saria et al. (2013) geodetic model. For sensitivity analysis using the Stamps et al. (2008) geodetic model, the upper and lower values for  $\nu$  are 2.56 and 3.12 mm/yr respectively (Table 5). The design of this table (i.e. whether an upper or lower value of each parameter is chosen) is derived from Box et al. (1978) and can be accessed at: <https://www.itl.nist.gov/div898/handbook/pri/section3/eqns/2to7m1.txt> (date last accessed 30/03/2020).

23    **Table S2**

| <b>Compon</b>              |                  |                         |                          |                            |           |           |          |
|----------------------------|------------------|-------------------------|--------------------------|----------------------------|-----------|-----------|----------|
| <b>Paramet</b>             | <b>ent of</b>    | <b><math>\nu</math></b> | <b><math>\phi</math></b> | <b><math>\delta</math></b> | <b>C1</b> | <b>C2</b> | <b>L</b> |
| <b>er</b>                  | <b>regional</b>  | <b>(mm/yr)</b>          |                          |                            |           |           |          |
|                            | <b>extension</b> |                         |                          |                            |           |           |          |
| <b>Compon</b>              |                  |                         |                          |                            |           |           |          |
| <b>ent of</b>              |                  |                         |                          |                            |           |           |          |
| <b>regional</b>            |                  |                         |                          |                            |           |           |          |
| <b>extension</b>           |                  |                         |                          |                            |           |           |          |
| <b><math>\nu</math></b>    | 0.00             | -                       |                          |                            |           |           |          |
| <b>(mm/yr)</b>             |                  |                         |                          |                            |           |           |          |
| <b><math>\phi</math></b>   | 0.00             | 0.00                    | -                        |                            |           |           |          |
| <b><math>\delta</math></b> | 0.00             | 0.00                    | 0.00                     | -                          |           |           |          |
| <b>C1</b>                  | 0.00             | 0.00                    | 0.00                     | 0.00                       | -         |           |          |
| <b>C2</b>                  | 0.00             | 0.00                    | 0.00                     | 0.00                       | 0.00      | -         |          |
| <b>L</b>                   | 0.00             | 0.00                    | 0.00                     | 0.00                       | 0.00      | 0.00      | -        |

24    Table S2: Results of parameter-parameter interaction effects on sensitivity analysis using  
25    approach outlined in Eq. A3. All results are zero (to two decimal places), and so there are no  
26    parameter-parameter effects in the sensitivity analysis outlined here. See Appendix A for  
27    discussion.

28

29
