# Supplementary material for: A systems-based approach to parameterise seismic hazard in regions with little historical or instrumental seismicity: active fault and seismogenic source databases for southern Malawi
Source: Copernicus journal article supplement (doi:10.5194/se-12-187-2021), 2021-01-27
Supplement: Supplementary file [file se-12-187-2021-supplement-title-page.pdf › se-12-187-2021-supplement-title-page.pdf]

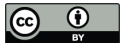

## *Supplement of*

# **A systems-based approach to parameterise seismic hazard in regions with little historical or instrumental seismicity: active fault and seismogenic source databases for southern Malawi**

**Jack N. Williams et al.**

*Correspondence to:* Jack N. Williams ([williamsj132@cardiff.ac.uk](mailto:williamsj132@cardiff.ac.uk))

- [se-12-187-2021-supplement-title-page.pdf](#)
- [MalawiOtherFaultsLicense.txt](#)
- [Malawi\\_OtherFaults.cpg](#)
- [Malawi\\_OtherFaults.dbf](#)
- [Malawi\\_OtherFaults.prj](#)
- [Malawi\\_OtherFaults.qpj](#)
- [Malawi\\_OtherFaults.shp](#)
- [Malawi\\_OtherFaults.shx](#)
- [Malawi\\_OtherFaults.zip](#)
- [SMAFD\\_20201910.dbf](#)
- [SMAFD\\_20201910.prj](#)
- [SMAFD\\_20201910.qpj](#)
- [SMAFD\\_20201910.shp](#)
- [SMAFD\\_20201910.shx](#)
- [SMAFD\\_License.txt](#)
- [SMSSD.xlsx](#)
- [SMSSD\\_20201910.dbf](#)
- [SMSSD\\_20201910.prj](#)
- [SMSSD\\_20201910.qpj](#)

- SMSSD\_20201910.shp
- SMSSD\_20201910.shx
- SMSSD\_License.txt
- TableS1.pdf

The copyright of individual parts of the supplement might differ from the CC BY 4.0 License.
